# Supplementary material for: Sustained CD4+ T cell-driven lymphopenia without a compensatory IL-7/IL-15 response among high-grade glioma patients treated with radiation and temozolomide
Source: PubMed Central journal article supplement — Oncoimmunology. 2014 Jan 3;3:e27357. doi: 10.4161/onci.27357 (PMC4004618; doi:10.4161/onci.27357), 2014-01-03
Supplement: onci-3-e27357-s01.pdf [file onci-3-e27357-s01.pdf]

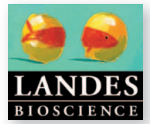

## **Supplemental Material to:**

**Susannah Ellsworth, Ani Balmanoukian, Ferdynand Kos, Christopher J Nirschl, Thomas R Nirschl, Stuart A Grossman, Leo Luznik, and Charles G Drake**

**Sustained CD4+ T cell-driven lymphopenia without a compensatory IL-7/IL-15 response among high-grade glioma patients treated with radiation and temozolomide**

**Oncolmunology 2013; 2(12)**

**<http://dx.doi.org/10.4161/onci.27357>**

**[http://www.landesbioscience.com/journals/oncoimmunology/  
article/27357/](http://www.landesbioscience.com/journals/oncoimmunology/article/27357/)**

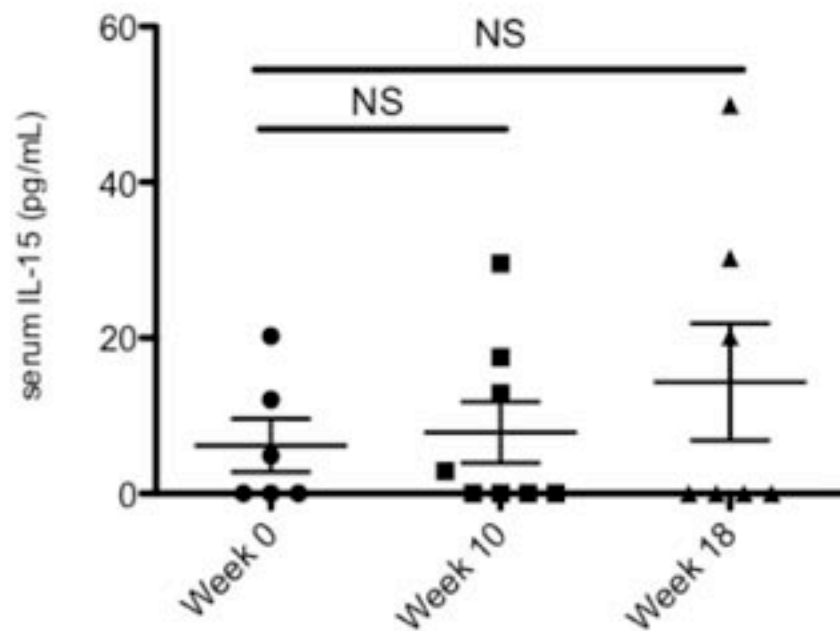

**Supplemental Figure 1: Serum IL-15 levels after RT/TMZ treatment for malignant glioma.**  
A) Serum IL-15 levels (pg/mL) at baseline, 10, and 18 weeks after completing treatment, showing no significant change.

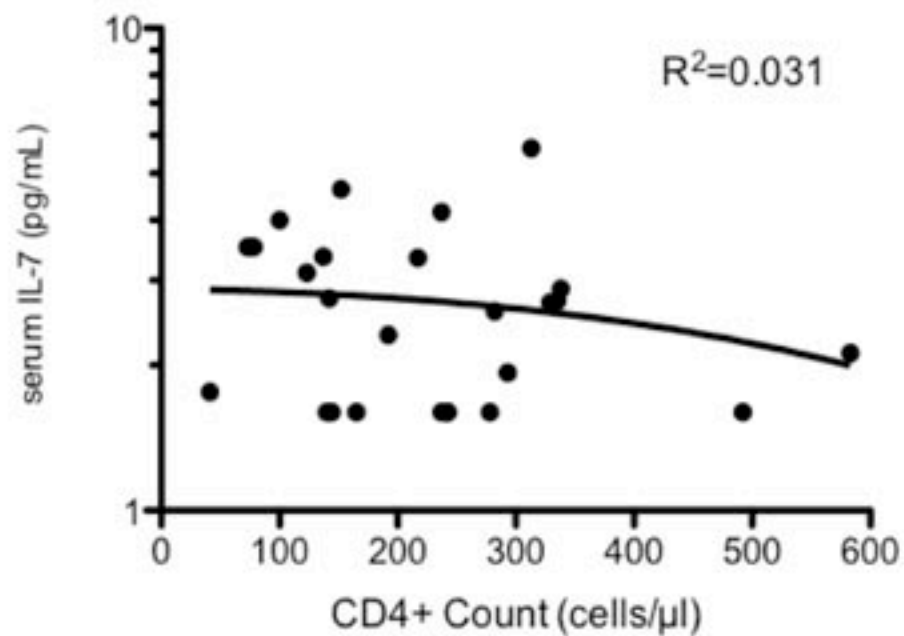

**Supplemental Fig. 2.** Scatterplot showing a lack of correlation between serum IL-15 levels (y-axis; pg/mL) and absolute peripheral CD4<sup>+</sup> lymphocyte counts (x-axis; cells/μL).

**Supplemental Figure 1. Serum IL-15 levels after RT/TMZ treatment for malignant glioma.** Serum interleukin (IL)-15 levels (pg/mL) in Grade III and IV glioma patients subjected to radiation therapy (RT) and temozolomide (TMZ) treatment, at baseline, week 10 (4 weeks after completing RT/TMZ) and week 18 (12 weeks after completing RT/TMZ).

**Supplemental Figure 2. Lack of correlation between circulating IL-15 levels and CD4<sup>+</sup> -cell counts after RT/TMZ treatment for malignant glioma.** Scatterplot of serum interleukin-15(IL-15) levels (y-axis; pg/mL) and absolute peripheral CD4<sup>+</sup> T lymphocyte counts from **Figure 2C** (x-axis; cells/ $\mu$ L), as monitored in Grade III and IV glioma patients subjected to radiation therapy (RT) and temozolomide (TMZ) treatment.
